# Supplementary material
Source: PubMed Central journal article supplement (PMC5876081)
Supplement: NIHMS923741-supplement-Supp_FigS1.pdf [file NIHMS923741-supplement-Supp_FigS1.pdf]

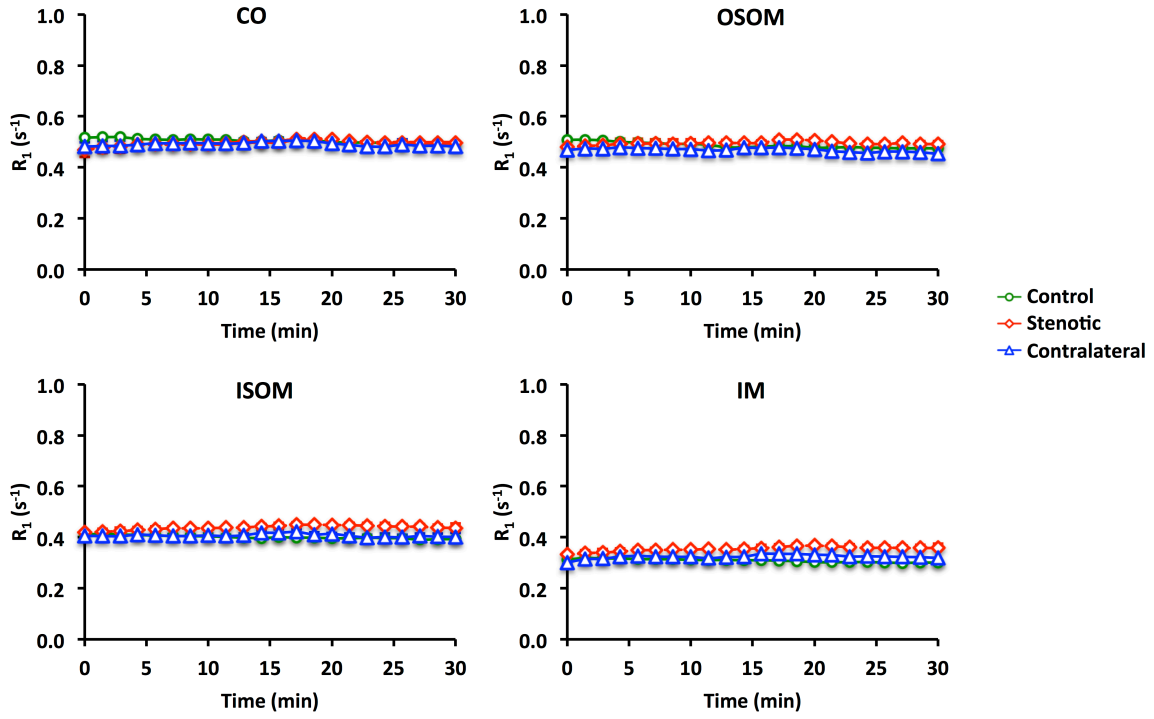

**Supporting Figure S1.** Measured time courses of  $R_1$  changes in CO, OSOM, ISOM, and IM of control, stenotic, and contralateral kidneys with saline injection. Data expressed as mean $\pm$ standard error.
